# Supplementary material for: Inhibition of plastid PPase and NTT leads to major changes in starch and tuber formation in potato
Source: PubMed Central journal article supplement (PMC6018912; doi:10.1093/jxb/ery051), 2018-03-10
Supplement: ery051_suppl_supplementary-figure-and-table.pdf [file ery051_suppl_supplementary-figure-and-table.pdf]

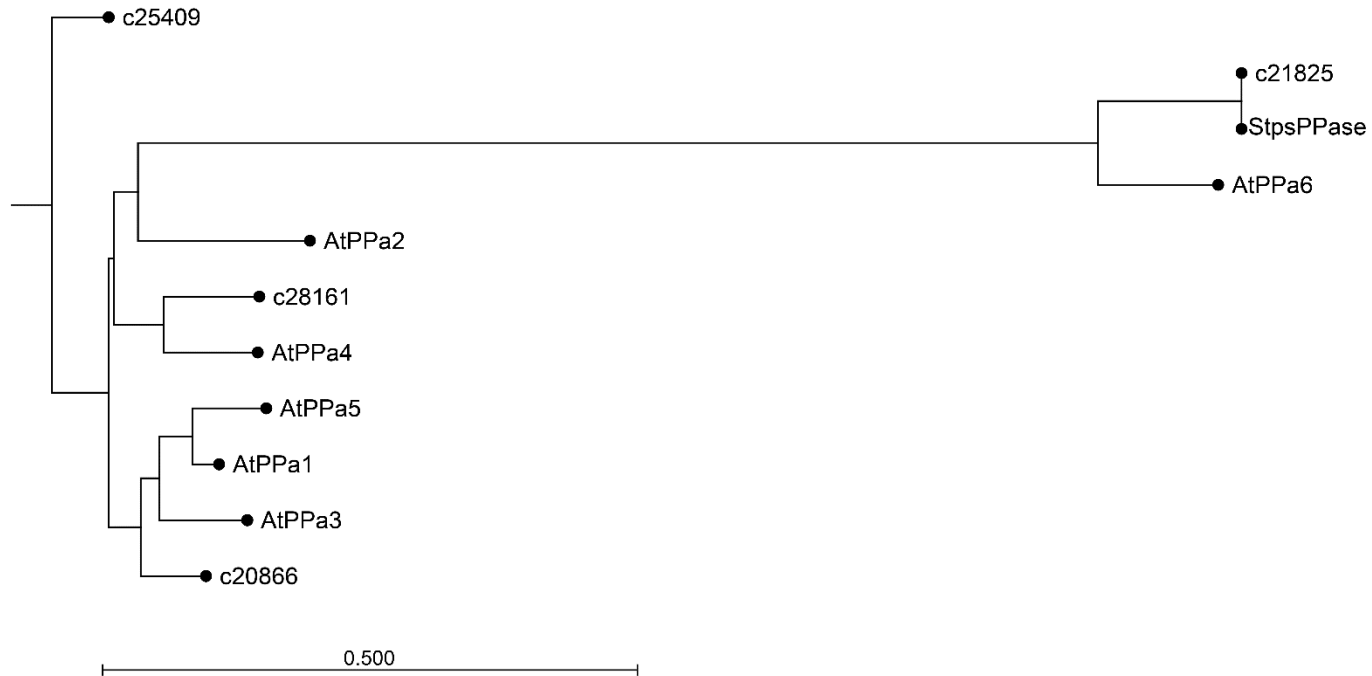

**Figure S1.** Phylogenetic tree of pyrophosphorylase homologs. Phylogenetic analysis based on aa sequences of pyrophosphorylase homologs from Arabidopsis (AtPPa1-6), aa sequence derived from tuber expressed contigs of potato variety Kuras (c20866, c21825, c25409 and c28161) (Hofvander *et al.*, 2016) and the aa sequence deduced from the putative gene used in the present study (StpsPPase).

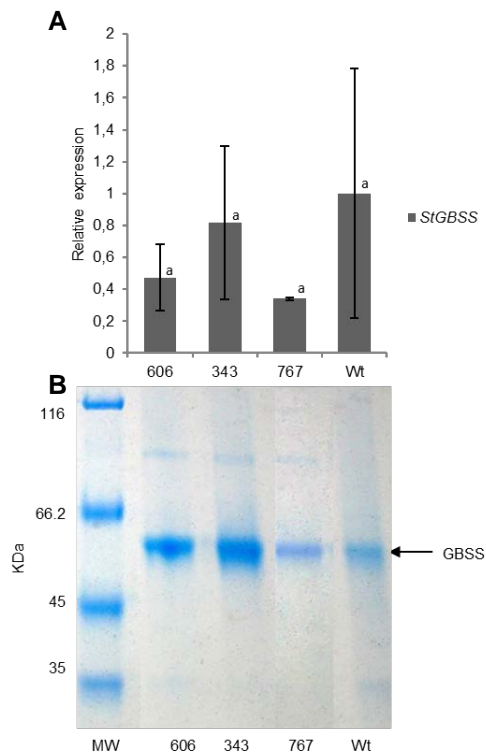

**Fig. S2.** GBSS transcript levels and visualization of starch bound proteins. **A.** Expression levels of *StGBSS* in lines 606 (*StpsPPase*-inhibition), 343 (*StNTT*-inhibition) and 767 (*StpsPPase*+*StNTT*-inhibition) and wild type (Wt) analyzed with real-time PCR. Expression levels of *StGBSS* were normalized to the reference gene actin. Expression level in wild type was set to one (1). Data are mean values ( $\pm$ SD) of three biological replicates. Samples sharing the same letters are not significantly different according to Tukey's test ( $P = 0.05$ ).

**B.** Starch bound proteins separated on a 10% SDS-PAGE: 606 (*StpsPPase*-inhibition); 343 (*StNTT*-inhibition); 767 (*StpsPPase*+*StNTT* -inhibition); and wild type (Wt). Size marker (MW): Thermo Scientific™ Pierce™ Unstained Protein Molecular Weight Marker. GBSS protein (60 kDa) is marked with an arrow.

**Table S1.** Primers used for screening leaf tissue for transgene presence (NPTII) and *Agrobacterium* contamination (VirG) and primers used for analysis of gene expression using q-PCR (Actin, NTT, PPa, GBSS).

| Primer names       | Primer sequence                 |
|--------------------|---------------------------------|
| nptII <sub>f</sub> | 5'-CCTGTCATCTCACCTTGCTC-3'      |
| nptII <sub>r</sub> | 5'-AGTCCCGCTCAGAAGAACTC-3'      |
| VirG-              | 5'-GCCGGGGCGAGACCATAGG-3'       |
| VirG+              | 5'-CGCACGCGCAAGGCAACC-3'        |
| StActin-F          | 5'-ACAAGTGATGGCTGGAATAAGACTT-3' |
| StActinrev         | 5'-CCAGATGGTCAGGTGATTACCA-3'    |
| qStnttF            | 5'-GTTTGGACTTGGAGCGAATG-3'      |
| qStnttR            | 5'-TTTCAGGGAGATAGCCCAAC-3'      |
| qStppa6.1F         | 5'-CAACAAGCCAGCAAACAAGG-3'      |
| qStppa6.1R         | 5'-CAAGTGAAAGCTCACCAGCA-3'      |
| StGBSS1f           | 5'-TTGCATAACTGGGATTGTGAATG-3'   |
| StGBSS1r           | 5'-GACAGTGGTTATATCGTATTTGA-3'   |

**Table S2.** Relative quantities of metabolites in lines 606 and 628 (*StpsPPase*-inhibition); 343 and 345 (*StNTT*-inhibition); 718, 729, 753, 754, 764 and 767 (*StpsPPase+StNTT*-inhibition); and wild type (Wt). Wild type is set to 1. Significant values are marked in bold. n = 3.

| Amino acids             | Wt     | 606               | 628              | 343              | 345              | 718              | 729              | 753              | 754               | 764              | 767               |
|-------------------------|--------|-------------------|------------------|------------------|------------------|------------------|------------------|------------------|-------------------|------------------|-------------------|
| Alanine                 | 1±0,38 | 1,03±0,2          | 1,11±0,4         | 0,81±0,13        | 0,66±0,16        | 1,23±0,19        | 0,51±0,13        | 0,7±0,17         | 1,17±0,3          | 0,49±0,03        | 0,85±0,05         |
| Arginine                | 1±0,03 | <b>17,00±2,67</b> | <b>6,01±1,98</b> | <b>7,42±1,54</b> | <b>2,77±0,23</b> | <b>7,62±0,17</b> | <b>6,95±1,15</b> | 7,04±6,23        | <b>14,92±4,03</b> | <b>14,5±0,75</b> | <b>12,37±3,44</b> |
| Asparagine              | 1±0,04 | <b>0,32±0,13</b>  | <b>0,4±0,3</b>   | <b>0,43±0,15</b> | <b>0,63±0,3</b>  | <b>0,46±0,14</b> | <b>0,55±0,25</b> | <b>0,36±0,19</b> | <b>0,36±0,25</b>  | <b>0,2±0,09</b>  | <b>0,1±0,06</b>   |
| Butyric acid, 4-amino   | 1±0,68 | 1,19±0,37         | 0,82±0,2         | 1,19±0,15        | 1,07±0,32        | 0,86±0,38        | 0,28±0,16        | 0,87±0,21        | 1,27±0,05         | 0,11±0,02        | 0,72±0,15         |
| Cystine                 | 1±0,29 | 0,97±0,1          | <b>1,88±0,4</b>  | 0,72±0,1         | 0,97±0,23        | <b>1,23±0,26</b> | 1,41±0,34        | 1,14±0,18        | 0,94±0,33         | 0,65±0,03        | 0,79±0,2          |
| Gluconic acid           | 1±0,29 | 0,68±0,11         | 0,73±0,13        | 1,05±0,52        | 0,76±0,21        | 0,82±0,33        | 0,81±0,06        | <b>0,87±0,25</b> | 0,67±0,14         | 1,17±0,1         | 0,75±0,13         |
| Glutamic acid           | 1±0,25 | 0,87±0,15         | 1,05±0,31        | 1,05±0,16        | 1,44±0,17        | 0,93±0,32        | 1,07±0,08        | 1,31±0,32        | 0,85±0,4          | <b>0,5±0,04</b>  | 0,68±0,22         |
| Glutamine               | 1±0,28 | 1,38±0,74         | 0,73±0,35        | 0,60±0,25        | 1,18±0,85        | 1,14±0,24        | 0,58±0,3         | <b>0,43±0,02</b> | 1,07±0,18         | 0,6±0,3          | 0,55±0,12         |
| Glycine                 | 1±0,2  | 2,13±0,57         | 2,68±1,36        | <b>2,03±0,37</b> | <b>2,16±0,26</b> | <b>2,73±0,27</b> | 1,22±0,44        | <b>1,53±0,38</b> | 1,84±0,45         | 0,65±0,14        | <b>1,48±0,24</b>  |
| Histidine               | 1±0,41 | <b>3,04±1,24</b>  | 2,99±2,59        | <b>0,10±0,01</b> | <b>0,77±0,42</b> | <b>3,25±0,97</b> | 2,01±0,88        | 1,02±0,12        | 2,09±1,3          | 0,7±0,4          | 0,78±0,3          |
| Isoleucine              | 1±0,77 | <b>2,68±0,23</b>  | <b>3,2±1,72</b>  | 1,22±0,3         | 2,57±0,29        | <b>3,17±1,38</b> | <b>2,57±0,99</b> | 1,32±0,07        | 1,5±0,06          | 1,08±0,37        | 1,83±0,33         |
| Lysine                  | 1±0,64 | <b>3,44±1</b>     | 4,2±3,52         | 0,75±0,37        | <b>1,95±0,51</b> | 4,31±2,34        | <b>2,25±0,77</b> | 1,34±0,28        | 2,47±1,1          | 0,77±0,33        | 1,38±0,47         |
| Methionine              | 1±0,5  | 1,15±0,29         | 1,36±1           | 1,35±0,3         | <b>2,04±0,85</b> | 1,42±0,44        | 0,83±0,41        | 0,82±0,28        | 0,78±0,35         | 0,24±0,03        | 0,38±0,17         |
| Ornithine               | 1±0,13 | <b>5,09±1,78</b>  | 1,63±1,26        | 0,66±0,26        | 0,85±0,31        | <b>3,51±0,88</b> | <b>1,95±0,38</b> | 1,23±0,6         | 3,32±1,57         | 1,07±0,45        | 2,17±0,87         |
| Phenylalanine           | 1±0,73 | <b>3,17±0,12</b>  | <b>2,49±0,77</b> | <b>3,10±0,52</b> | 2,77±1,13        | <b>3,3±0,5</b>   | 1,4±0,55         | 1,45±0,58        | <b>2,29±0,29</b>  | 1,76±0,73        | <b>3,26±0,4</b>   |
| Proline                 | 1±0,7  | <b>1,77±0,44</b>  | <b>2,63±0,79</b> | 2,05±0,26        | <b>3,04±0,35</b> | 2,4±0,07         | <b>1,88±0,5</b>  | 1,38±0,28        | 1,21±0,35         | 0,93±0,1         | 1,1±0,28          |
| Purine, 6-benzylamino-  | 1±0,08 | <b>2,27±0,36</b>  | <b>6,13±1,15</b> | 2,89±1,01        | <b>4,87±1,33</b> | 4,26±1,71        | 12,59±9,1        | <b>3,51±0,72</b> | 2,48±0,95         | 6,47±1,74        | 2,51±1,31         |
| Putrescine              | 1±0,13 | <b>4,83±0,91</b>  | 2,78±1,1         | <b>2,31±0,33</b> | <b>2,11±0,41</b> | 2,98±1,43        | <b>2,21±0,12</b> | 1,69±0,52        | <b>2,38±0,1</b>   | 2,38±0,96        | <b>2,7±0,73</b>   |
| Pyroglutamic acid       | 1±0,2  | 0,84±0,26         | 0,59±0,24        | 0,77±0,09        | 1,03±0,43        | 0,79±0,24        | 0,54±0,18        | 0,53±0,15        | 0,84±0,52         | <b>0,4±0,13</b>  | <b>0,4±0,12</b>   |
| Pyrraline-2-carboxylate | 1±0,22 | 0,67±0,05         | 0,51±0,04        | 0,91±0,55        | 0,57±0,15        | <b>0,35±0,07</b> | 0,57±0,23        | <b>0,31±0,06</b> | <b>0,33±0,14</b>  | 0,48±0,14        | <b>0,3±0,08</b>   |

|            |        |                  |                  |                  |                  |                  |                  |                 |                  |           |                 |
|------------|--------|------------------|------------------|------------------|------------------|------------------|------------------|-----------------|------------------|-----------|-----------------|
| Serine     | 1±0,21 | 1,56±0,42        | 2,43±1,07        | <b>2,21±0,24</b> | <b>3,13±0,51</b> | <b>3,17±0,37</b> | <b>1,93±0,59</b> | 1,93±0,51       | 1,74±0,97        | 0,72±0,17 | 1,04±0,36       |
| Threonine  | 1±0,27 | <b>1,91±0,52</b> | <b>2,77±1,08</b> | <b>0,81±0,24</b> | <b>1,57±0,27</b> | <b>2,68±0,28</b> | <b>1,65±0,39</b> | 1,19±0,25       | 1,43±0,61        | 0,54±0,15 | 1,1±0,35        |
| Tryptophan | 1±1,14 | 0,47±0,08        | 1,21±1,23        | 0,22±0,04        | 0,45±0,13        | 1,5±1,46         | 0,51±0,37        | 0,23±0,05       | 0,46±0,17        | 0,4±0,33  | 0,55±0,17       |
| Tyramine   | 1±0,45 | 2,38±0,28        | 0,95±0,35        | 1,24±0,33        | 1,37±0,43        | 1,26±0,34        | 2,06±1,16        | 0,97±0,23       | 1,37±0,39        | 1,73±0,99 | 1,09±0,23       |
| Tyrosine   | 1±1,03 | 1,77±0,21        | 5,14±4,76        | 0,79±0,29        | 1,86±0,49        | 4,05±3,04        | <b>1,72±1,01</b> | 1±0,1           | 1,53±0,36        | 0,9±0,64  | 1,75±0,73       |
| Valine     | 1±0,37 | <b>4,76±0,58</b> | <b>3,58±0,52</b> | <b>1,70±0,27</b> | <b>2,48±0,18</b> | <b>4,35±1,14</b> | <b>2,65±0,95</b> | <b>2,17±0,5</b> | <b>3,77±0,75</b> | 1,57±0,46 | <b>3,3±0,93</b> |

| <b>Organic acids</b>         | <b>WT</b> | <b>606</b>         | <b>628</b>         | <b>343</b>         | <b>345</b>       | <b>718</b>       | <b>729</b>        | <b>753</b>         | <b>754</b>         | <b>764</b>        | <b>767</b>         |
|------------------------------|-----------|--------------------|--------------------|--------------------|------------------|------------------|-------------------|--------------------|--------------------|-------------------|--------------------|
| Aconitic acid                | 1±0,19    | <b>2,73±0,21</b>   | <b>5,87±1,03</b>   | <b>1,86±0,53</b>   | <b>3,11±1,15</b> | <b>8±2,39</b>    | <b>5,49±0,41</b>  | <b>2,99±0,8</b>    | <b>2,68±0,75</b>   | 1,43±0,08         | <b>2,74±0,85</b>   |
| Adipic acid                  | 1±0,09    | <b>0,68±0,07</b>   | 0,65±0,29          | 0,87±0,54          | 1,35±0,66        | 0,99±0,35        | 1,09±0,43         | 1,06±0,31          | 0,75±0,74          | <b>0,36±0,1</b>   | 0,65±0,34          |
| Aspartic acid                | 1±0,03    | 1,17±0,27          | 1±0,31             | <b>0,44±0,06</b>   | <b>0,67±0,12</b> | 1,35±0,65        | 0,92±0,22         | <b>0,69±0,05</b>   | <b>0,65±0,17</b>   | <b>0,56±0,08</b>  | <b>0,55±0,13</b>   |
| Cinnamic acid, 4-hydroxy-    | 1±0,15    | <b>1,36±0,16</b>   | <b>2,64±0,53</b>   | <b>1,43±0,1</b>    | <b>1,77±0,16</b> | <b>1,68±0,16</b> | <b>2,01±0,38</b>  | <b>1,53±0,26</b>   | 1,31±0,37          | <b>1,68±0,14</b>  | <b>1,19±0,15</b>   |
| Eicosanoic acid methyl ester | 1±0,18    | 1,23±0,05          | <b>1,14±0,13</b>   | 1,11±0,03          | 1,17±0,09        | 1,1±0,02         | 1,08±0,07         | 0,99±0,03          | 1,11±0,02          | 1,01±0,07         | 1,13±0,1           |
| Erythronic acid              | 1±0,28    | <b>3,21±0,08</b>   | <b>2,7±0,33</b>    | <b>2,22±0,22</b>   | <b>2,56±0,22</b> | 2,67±0,85        | <b>2,82±0,23</b>  | <b>2,98±0,16</b>   | 2,13±0,9           | 1,49±0,13         | 1,82±1,28          |
| Fumaric acid                 | 1±0,17    | 1,53±0,36          | 1,42±0,17          | <b>3,18±0,9</b>    | 3,71±2,92        | 3,93±1,79        | 0,96±0,19         | 1,4±0,62           | 0,93±0,28          | 0,73±0,05         | 1,05±0,15          |
| Galactonic acid              | 1±0,29    | 0,68±0,11          | 0,73±0,13          | 1,05±0,52          | 0,76±0,21        | 0,82±0,33        | 0,81±0,06         | <b>0,87±0,25</b>   | 0,67±0,14          | 1,17±0,1          | 0,75±0,13          |
| Galactonic acid-1,4-lactone  | 1±0,24    | <b>11,61±4,65</b>  | <b>12,16±0,74</b>  | 5,15±3,75          | 3,25±3,13        | <b>6,85±0,57</b> | <b>6,74±2,96</b>  | 6,32±7,07          | <b>8,13±0,93</b>   | 36,13±21,91       | <b>6,28±1,32</b>   |
| Glucaric acid-1,4-lactone    | 1±0,22    | <b>43,22±13,04</b> | <b>26,23±12,53</b> | <b>30,45±13,09</b> | 22,34±21,29      | 14,35±8,49       | <b>25,43±5,04</b> | <b>33,92±29,18</b> | <b>57,26±28,62</b> | <b>31,07±6,99</b> | <b>33,56±10,37</b> |
| Glyceric acid                | 1±0,21    | <b>3,3±0,8</b>     | <b>3,11±1,22</b>   | 1,42±0,1           | <b>2,11±0,09</b> | <b>2,89±1,09</b> | 1,71±0,44         | <b>1,58±0,24</b>   | 1,56±0,19          | 0,71±0,15         | 1,39±0,27          |
| Isocitric acid               | 1±0,22    | <b>2,57±0,78</b>   | 1,62±0,65          | <b>1,9±0,06</b>    | 2,64±1,06        | <b>2,13±0,04</b> | 1,4±0,41          | <b>1,76±0,15</b>   | <b>3,94±0,65</b>   | 1,38±0,41         | <b>1,53±0,18</b>   |
| Lactic acid dimer            | 1±0,23    | 1,01±0,07          | 0,9±0,08           | 1,02±0,05          | 1,03±0,13        | 0,91±0,03        | 1±0,03            | 0,94±0,03          | 1,06±0,14          | 0,99±0,07         | 1,09±0,19          |
| Malic acid                   | 1±0,36    | <b>3,67±0,1</b>    | <b>3,11±0,39</b>   | <b>2,43±0,23</b>   | <b>2,9±0,25</b>  | <b>2,98±0,92</b> | <b>3,16±0,25</b>  | <b>3,57±0,39</b>   | 2,81±1,47          | 1,71±0,17         | <b>3,59±0,32</b>   |

|                                 |        |                  |                  |                  |                  |                  |                  |                  |                  |                  |                  |
|---------------------------------|--------|------------------|------------------|------------------|------------------|------------------|------------------|------------------|------------------|------------------|------------------|
| Nicotinic acid                  | 1±0,29 | <b>1,56±0,41</b> | <b>2,6±0,24</b>  | 1,27±0,36        | 1,75±0,25        | <b>1,82±0,12</b> | <b>1,84±0,54</b> | 1,16±0,32        | 0,79±0,22        | 0,61±0           | 0,81±0,23        |
| Nonadecanoic acid methyl ester  | 1±0,22 | 0,87±0,05        | 0,78±0,07        | 0,82±0,01        | 0,92±0,06        | 0,83±0,01        | 0,9±0,02         | 0,92±0,01        | 0,91±0,05        | 0,91±0,01        | 1,01±0,14        |
| Octadecanoic acid               | 1±0,15 | 0,95±0,06        | <b>0,9±0,15</b>  | 0,88±0,06        | 0,82±0,07        | <b>0,76±0,04</b> | <b>0,88±0,11</b> | 0,78±0,03        | 0,9±0,01         | 1,14±0,01        | 1,19±0,15        |
| Phosphoric acid                 | 1±0,21 | <b>0,6±0,09</b>  | <b>0,67±0,08</b> | 0,63±0,03        | 0,78±0,03        | <b>0,63±0,07</b> | 0,77±0,05        | 0,92±0,12        | 0,6±0,08         | 0,67±0,06        | <b>0,48±0,04</b> |
| Quinic acid                     | 1±0,12 | 2,24±0,66        | <b>2,9±0,26</b>  | 2,3±0,83         | <b>3,08±0,64</b> | <b>2,35±0,58</b> | <b>4,05±0,31</b> | <b>3,09±0,78</b> | <b>2,2±0,33</b>  | <b>4,78±0,04</b> | <b>2,56±0,61</b> |
| Succinic acid                   | 1±0,19 | <b>0,54±0,07</b> | <b>0,53±0,07</b> | <b>0,46±0</b>    | <b>0,35±0,11</b> | 0,47±0,18        | <b>0,3±0,04</b>  | <b>0,35±0,04</b> | <b>0,39±0,01</b> | <b>0,44±0,04</b> | <b>0,48±0,05</b> |
| Tetradecanoic acid methyl ester | 1±0,17 | 0,9±0,05         | 0,79±0,06        | 0,87±0,01        | 0,9±0,05         | 0,84±0,02        | 0,88±0,03        | 0,88±0,03        | 0,89±0,05        | 0,92±0,01        | 1±0,12           |
| Threonic acid                   | 1±0,05 | 1,08±0,23        | 0,92±0,27        | <b>0,49±0,07</b> | <b>0,66±0,1</b>  | 1,2±0,56         | 0,84±0,17        | <b>0,67±0,05</b> | <b>0,64±0,15</b> | <b>0,54±0,08</b> | <b>0,55±0,12</b> |
| Triacontanoic acid methyl ester | 1±0,13 | 1,04±0,06        | 0,91±0,07        | 0,86±0,02        | 1,04±0,1         | 0,87±0,05        | 0,96±0           | 0,98±0,09        | 1,05±0,04        | 1,1±0,02         | <b>1,16±0,14</b> |

| Sugars               | Wt     | 606               | 628              | 718              | 729              | 753              | 754              | 764               | 767               |
|----------------------|--------|-------------------|------------------|------------------|------------------|------------------|------------------|-------------------|-------------------|
| Erythrose            | 1±0,23 | 1,01±0,07         | 0,9±0,08         | 0,91±0,03        | 1±0,03           | 0,94±0,03        | 1,06±0,14        | 0,99±0,07         | 1,09±0,19         |
| Fructose             | 1±0,21 | 1,22±0,64         | 4,21±3,29        | 4,3±2,36         | 4,07±4,06        | 2,84±2,06        | 1,09±0,24        | <b>2,77±0,64</b>  | <b>1,74±0,25</b>  |
| Galactinol           | 1±0,24 | <b>0,39±0,08</b>  | 1,01±0,55        | 0,66±0,51        | 2,9±1,1          | 0,76±0,32        | <b>0,35±0,1</b>  | <b>0,45±0,01</b>  | 0,85±0,32         |
| Glucose              | 1±0,24 | <b>1,66±0,12</b>  | 1,37±0,14        | 1,24±0,03        | 1,42±0,12        | <b>1,77±0,13</b> | <b>2,03±0,11</b> | <b>2,1±0,11</b>   | <b>2,38±0,35</b>  |
| Glycerol             | 1±0,2  | 0,99±0,04         | 0,91±0,09        | 0,91±0,01        | 0,93±0,05        | 0,99±0,04        | 0,96±0,03        | 0,89±0,03         | 0,97±0,14         |
| Glycerol-3-phosphate | 1±0,1  | <b>0,32±0,05</b>  | <b>0,34±0,08</b> | <b>0,27±0,04</b> | <b>0,46±0,08</b> | <b>0,49±0,14</b> | <b>0,37±0,15</b> | <b>0,4±0,11</b>   | <b>0,2±0,04</b>   |
| Gulose               | 1±0,25 | <b>2,96±0,24</b>  | <b>5,61±0,78</b> | <b>7,59±2,18</b> | <b>5,81±0,23</b> | <b>3,42±0,83</b> | 2,54±1,2         | 1,33±0,32         | 2,74±1,27         |
| Kestose              | 1±0,37 | 4,86±2,01         | 5,21±3,83        | 4,43±3,09        | 2,63±1,63        | 5,15±2,64        | <b>5,19±0,42</b> | <b>5,27±2,49</b>  | <b>6,32±1,33</b>  |
| Maltose              | 1±0,74 | <b>11,84±2,63</b> | <b>9,6±3,64</b>  | 8,23±3,5         | <b>7,99±2,14</b> | 6,17±4,44        | <b>9,96±3,07</b> | <b>14,69±0,36</b> | <b>10,66±2,33</b> |
| Mannitol             | 1±0,17 | <b>2,27±0,11</b>  | <b>3,78±0,42</b> | <b>4,77±1,04</b> | <b>3,68±0,19</b> | <b>2,34±0,47</b> | 1,94±0,62        | 1,22±0,12         | <b>2,19±0,61</b>  |
| Mannose              | 1±0,25 | <b>2,96±0,24</b>  | <b>5,61±0,78</b> | <b>7,59±2,18</b> | <b>5,81±0,23</b> | <b>3,42±0,83</b> | 2,54±1,2         | 1,33±0,32         | 2,74±1,27         |

|           |        |                  |                  |                  |                  |           |                  |                  |                  |
|-----------|--------|------------------|------------------|------------------|------------------|-----------|------------------|------------------|------------------|
| Raffinose | 1±0,37 | 4,86±2,01        | 5,21±3,83        | 4,43±3,09        | 2,63±1,63        | 5,15±2,64 | <b>5,19±0,42</b> | <b>5,27±2,49</b> | <b>6,32±1,33</b> |
| Rhamnose  | 1±0,26 | 1,02±0,08        | <b>1,7±0,33</b>  | <b>1,67±0,42</b> | 1,93±0,65        | 1,29±0,21 | 0,93±0,25        | 1,04±0,14        | 0,89±0,11        |
| Sucrose   | 1±0,06 | <b>0,67±0,05</b> | <b>0,55±0,06</b> | <b>0,46±0,08</b> | <b>0,62±0,06</b> | 0,82±0,08 | 1±0,06           | 1,05±0,04        | 1,13±0,15        |
| Tagatose  | 1±0,15 | 0,91±0,06        | 0,97±0,1         | 1,05±0,07        | 1,1±0,01         | 1,06±0,05 | 1,01±0,09        | 0,9±0,02         | 1,1±0,1          |
| Xylose    | 1±0,3  | <b>4,99±1,02</b> | 2,66±1,21        | <b>3,07±0,22</b> | 4,94±2,44        | 2,45±1,74 | 3,6±1,63         | <b>9,2±1,25</b>  | <b>5,16±1,04</b> |
| Xylulose  | 1±0,23 | <b>0,84±0,15</b> | 1,01±0,31        | 0,88±0,3         | 1,03±0,09        | 1,23±0,34 | 0,76±0,32        | <b>0,5±0,03</b>  | 0,64±0,2         |

| Others                         | Wt     | 606              | 628              | 343              | 345              | 718              | 729              | 753              | 754              | 764              | 767              |
|--------------------------------|--------|------------------|------------------|------------------|------------------|------------------|------------------|------------------|------------------|------------------|------------------|
| Arabitol                       | 1±0,08 | 0,99±0,07        | 0,95±0,03        | 1,01±0,03        | 0,98±0           | 0,97±0,01        | 1,01±0,03        | 0,97±0,05        | 1±0,07           | 1±0,04           | 0,99±0           |
| Calystegine A3                 | 1±0,08 | <b>0,77±0,09</b> | 0,7±0,28         | 0,89±0,52        | 1,4±0,65         | 1,09±0,39        | 1,15±0,47        | 1,1±0,29         | 0,76±0,73        | <b>0,4±0,12</b>  | 0,71±0,35        |
| Calystegine B2                 | 1±0,06 | <b>0,55±0,12</b> | 0,89±0,38        | 0,6±0,43         | 1,32±0,65        | 1,02±0,33        | 1,36±0,57        | 1,12±0,25        | 0,58±0,56        | <b>0,53±0,09</b> | 0,56±0,31        |
| Glucosone                      | 1±0,2  | <b>1,85±0,29</b> | <b>1,78±0,51</b> | <b>2,34±0,27</b> | <b>2,05±0,61</b> | 1,4±0,6          | <b>1,45±0,17</b> | <b>1,67±0,31</b> | <b>1,91±0,09</b> | <b>1,8±0,09</b>  | 1,43±0,28        |
| Hexadecanoic acid methyl ester | 1±0,17 | 1,04±0,04        | 0,87±0,09        | 0,96±0,04        | 1,01±0,07        | 0,9±0,03         | 1,01±0,04        | 1,04±0,06        | 1,15±0,03        | 1,19±0,02        | 1,22±0,09        |
| Naringenin                     | 1±0,11 | 2,42±0,76        | <b>3,3±0,36</b>  | 2,61±1,01        | <b>3,51±0,8</b>  | <b>2,65±0,71</b> | <b>4,76±0,24</b> | <b>3,26±0,83</b> | <b>2,27±0,36</b> | <b>5,53±0,14</b> | <b>2,72±0,67</b> |
| Stigmasterol                   | 1±0,11 | <b>1,17±0,07</b> | <b>1,12±0,09</b> | 1,04±0,01        | 1,2±0,11         | 1,06±0,07        | 1,04±0,04        | 1,02±0,1         | 1,06±0,04        | 1,05±0,07        | 1,13±0,15        |
| Tocopherol                     | 1±0,14 | 1,15±0,4         | <b>1,54±0,14</b> | 0,57±0,17        | 1,06±0,42        | 1,3±0,3          | <b>1,9±0,23</b>  | 1,28±0,54        | 0,9±0,35         | <b>3,83±0,75</b> | <b>1,9±0,32</b>  |
| Urea                           | 1±0,1  | 0,92±0,08        | <b>0,77±0,13</b> | 1,07±0,24        | 1,35±0,48        | 0,91±0,17        | 0,94±0,1         | <b>0,85±0,12</b> | <b>0,59±0,12</b> | <b>0,8±0,15</b>  | 0,96±0,12        |
